# Supplementary material for: Association between 3-Year Repetitive Isolated Hematuria and eGFR Deterioration in an Apparently Healthy Population: A Retrospective Cohort Study
Source: MDPI journal article supplement (doi:10.3390/ijerph191811466), 2022-09-12
Supplement: s1 [file s1]

**Table S1. (a) Association between urinary outcomes and the frequency of hematuria, stratified by age**

|                        | Prevalence        |                  |                 |                  | p value | Risk ratio           |                      |                     |                  |
|------------------------|-------------------|------------------|-----------------|------------------|---------|----------------------|----------------------|---------------------|------------------|
|                        | thrice<br>(n=680) | twice<br>(n=429) | once<br>(n=440) | never<br>(n=555) |         | thrice<br>(n=680)    | twice<br>(n=429)     | once<br>(n=440)     | never<br>(n=555) |
| Hematuria, >=1+, n (%) |                   |                  |                 |                  |         |                      |                      |                     |                  |
| age 20-39 y.o. (n=340) | 59 (85.5)         | 52 (68.4)        | 32 (45.7)       | 28 (22.8)        | <0.001  | 3.78<br>(2.70-5.32)  | 3.03<br>(2.11-4.34)  | 2.00<br>(1.32-3.02) | Ref              |
| age 40-49 y.o. (n=795) | 186 (81.2)        | 97 (63.8)        | 82 (42.1)       | 55 (25.6)        | <0.001  | 3.16<br>(2.50-4.01)  | 2.50<br>(1.93-3.23)  | 1.62<br>(1.22-2.15) | Ref              |
| age 50-65 y.o. (n=586) | 322 (84.5)        | 143 (71.5)       | 77 (45.0)       | 44 (20.5)        | <0.001  | 4.15<br>(3.18-5.42)  | 3.49<br>(2.65-4.61)  | 2.21<br>(1.62-3.02) | Ref              |
| Hematuria, >=2+, n (%) |                   |                  |                 |                  |         |                      |                      |                     |                  |
| age 20-39 y.o. (n=340) | 34 (49.3)         | 23 (30.3)        | 11 (15.7)       | 10 (8.1)         | <0.001  | 6.11<br>(3.22-11.60) | 3.75<br>(1.90-7.45)  | 1.92<br>(0.86-4.30) | Ref              |
| age 40-49 y.o. (n=795) | 110 (48.0)        | 40 (26.3)        | 35 (17.9)       | 16 (7.4)         | <0.001  | 6.43<br>(3.94-10.49) | 3.54<br>(2.06-6.98)  | 2.38<br>(1.36-4.16) | Ref              |
| age 50-65 y.o. (n=586) | 180 (47.2)        | 59 (29.5)        | 19 (11.1)       | 11 (5.1)         | <0.001  | 9.28<br>(5.17-16.66) | 5.76<br>(3.12-10.65) | 2.18<br>(1.07-4.46) | Ref              |

**Table S1. (a) Association between urinary outcomes and the frequency of hematuria, stratified by age (continued)**

|                                         | Prevalence        |                  |                 |                  | p value | Risk ratio           |                      |                     |                  |
|-----------------------------------------|-------------------|------------------|-----------------|------------------|---------|----------------------|----------------------|---------------------|------------------|
|                                         | thrice<br>(n=680) | twice<br>(n=429) | once<br>(n=440) | never<br>(n=555) |         | thrice<br>(n=680)    | twice<br>(n=429)     | once<br>(n=440)     | never<br>(n=555) |
| <b>Proteinuria, ≥1+, n (%)</b>          |                   |                  |                 |                  |         |                      |                      |                     |                  |
| age 20-39 y.o. (n=340)                  | 7 (10.1)          | 6 (7.9)          | 1 (1.4)         | 2 (1.6)          | 0.01    | 6.29<br>(1.34-29.45) | 4.90<br>(1.01-23.64) | 0.87<br>(0.08-9.46) | Ref              |
| age 40-49 y.o. (n=795)                  | 18 (7.9)          | 7 (4.6)          | 5 (2.6)         | 18 (8.4)         | 0.04    | 0.94<br>(0.50-1.75)  | 0.55<br>(0.24-1.28)  | 0.30<br>(0.11-0.80) | Ref              |
| age 50-65 y.o. (n=586)                  | 28 (7.3)          | 10 (5.0)         | 6 (3.5)         | 11 (5.1)         | 0.3     | 1.44<br>(0.73-2.84)  | 0.98<br>(0.42-2.25)  | 0.69<br>(0.26-1.83) | Ref              |
| <b>Hematuria and Proteinuria, n (%)</b> |                   |                  |                 |                  |         |                      |                      |                     |                  |
| age 20-39 y.o. (n=340)                  | 6 (8.7)           | 4 (5.3)          | 1 (1.4)         | 2 (1.6)          | 0.06    | 5.39<br>(1.12-25.99) | 3.26<br>(0.61-17.39) | 0.87<br>(0.08-9.46) | Ref              |
| age 40-49 y.o. (n=795)                  | 17 (7.4)          | 5 (3.3)          | 3 (1.5)         | 10 (4.7)         | 0.03    | 1.59<br>(0.74-3.39)  | 0.71<br>(0.25-2.03)  | 0.33<br>(0.09-1.17) | Ref              |
| age 50-65 y.o. (n=586)                  | 26 (6.8)          | 6 (3.0)          | 4 (2.3)         | 5 (2.3)          | 0.02    | 2.95<br>(1.15-7.57)  | 1.29<br>(0.40-4.16)  | 1.01<br>(0.28-3.71) | Ref              |

**Table S1. (b) Association between urinary outcomes and the frequency of hematuria, stratified by sex**

|                                  | Prevalence        |                  |                 |                  | p value | Risk ratio           |                     |                     |                  |
|----------------------------------|-------------------|------------------|-----------------|------------------|---------|----------------------|---------------------|---------------------|------------------|
|                                  | thrice<br>(n=680) | twice<br>(n=429) | once<br>(n=440) | never<br>(n=555) |         | thrice<br>(n=680)    | twice<br>(n=429)    | once<br>(n=440)     | never<br>(n=555) |
| Hematuria, >=1+, n (%)           |                   |                  |                 |                  |         |                      |                     |                     |                  |
| male (n=1138)                    | 267 (79.9)        | 135 (61.1)       | 95 (41.3)       | 72 (20.8)        | <0.001  | 3.85<br>(3.11-4.77)  | 2.94<br>(2.33-3.70) | 1.97<br>(1.52-2.55) | Ref              |
| female (n=966)                   | 300 (87.2)        | 157 (75.8)       | 96 (46.6)       | 55 (26.6)        | <0.001  | 3.27<br>(2.60-4.12)  | 2.86<br>(2.25-3.63) | 1.75<br>(1.33-2.29) | Ref              |
| Hematuria, >=2+, n (%)           |                   |                  |                 |                  |         |                      |                     |                     |                  |
| male (n=1138)                    | 141 (42.2)        | 56 (25.3)        | 34 (14.8)       | 20 (5.8)         | <0.001  | 3.96<br>(2.85-5.50)  | 2.37<br>(1.62-3.47) | 2.62<br>(1.82-3.79) | Ref              |
| female (n=966)                   | 183 (53.0)        | 66 (31.9)        | 31 (15.0)       | 17 (8.2)         | <0.001  | 6.46<br>(4.05-10.29) | 3.88<br>(2.36-6.38) | 1.82<br>(1.04-3.19) | Ref              |
| Proteinuria, >=1+, n (%)         |                   |                  |                 |                  |         |                      |                     |                     |                  |
| male (n=1138)                    | 35 (10.5)         | 18 (8.1)         | 9 (3.9)         | 25 (7.2)         | 0.04    | 1.45<br>(0.89-2.38)  | 1.13<br>(0.63-2.02) | 0.54<br>(0.26-1.13) | Ref              |
| female (n=966)                   | 18 (5.2)          | 5 (2.4)          | 3 (1.5)         | 6 (2.9)          | 0.08    | 1.80<br>(0.73-4.46)  | 0.83<br>(0.26-2.69) | 0.50<br>(0.13-1.97) | Ref              |
| Hematuria and Proteinuria, n (%) |                   |                  |                 |                  |         |                      |                     |                     |                  |
| male (n=1138)                    | 32 (9.6)          | 11 (5.0)         | 5 (2.2)         | 13 (3.7)         | <0.001  | 2.56<br>(1.37-4.79)  | 1.33<br>(0.61-2.91) | 0.57<br>(0.21-1.59) | Ref              |
| female (n=966)                   | 17 (4.9)          | 4 (1.9)          | 3 (1.5)         | 4 (1.9)          | 0.05    | 2.55<br>(0.87-7.48)  | 1.00<br>(0.25-3.95) | 0.75<br>(0.17-3.31) | Ref              |

**Table S2. Baseline characteristics according to the consistency of hematuria**

|                                             | Total<br>(n=2,104) | consecutive hematuria<br>(n=853) | no consecutive<br>hematuria<br>(n=1,251) | P value |
|---------------------------------------------|--------------------|----------------------------------|------------------------------------------|---------|
| Age, years, mean (SD)                       | 48.3 (8.22)        | 49.9 (8.06)                      | 47.3 (8.17)                              | <0.001  |
| Male, n (%)                                 | 1138 (54.1)        | 426 (49.9)                       | 712 (56.9)                               | 0.002   |
| BMI, n (%)                                  |                    |                                  |                                          | 0.04    |
| <18.5                                       | 238 (11.3)         | 106 (12.4)                       | 132 (10.6)                               |         |
| ≥18.5, <25                                  | 1,511 (71.8)       | 622 (73.0)                       | 889 (71.1)                               |         |
| ≥25, <30                                    | 306 (14.6)         | 112 (13.1)                       | 194 (15.5)                               |         |
| ≥30                                         | 48 (2.3)           | 12 (1.4)                         | 36 (2.9)                                 |         |
| Dipstick hematuria, n (%)                   |                    |                                  |                                          | <0.001  |
| 1+                                          | 1,348 (64.1)       | 433 (50.8)                       | 915 (73.1)                               |         |
| 2+                                          | 639 (30.4)         | 364 (42.7)                       | 275 (22.0)                               |         |
| 3+                                          | 117 (5.56)         | 56 (6.57)                        | 61 (4.88)                                |         |
| Serum creatinine, mg/dl, mean (SD)          | 0.74 (0.13)        | 0.734 (0.128)                    | 0.740 (0.136)                            | 0.4     |
| eGFR, mL/min/1.73m <sup>2</sup> , mean (SD) | 80.0 (11.9)        | 78.55 (11.75)                    | 81.03 (11.97)                            | <0.001  |
| Hypertension, n (%)                         | 651 (31.0)         | 283 (33.3)                       | 368 (29.4)                               | 0.07    |
| Diabetes mellitus, n (%)                    | 302 (14.4)         | 109 (12.8)                       | 193 (15.5)                               | 0.09    |
| Dyslipidemia, n (%)                         | 869 (41.4)         | 367 (43.1)                       | 502 (40.2)                               | 0.2     |
| Hyperuricemia, n (%)                        | 289 (13.8)         | 115 (13.5)                       | 174 (13.9)                               | 0.8     |

Abbreviations: BMI, body mass index; eGFR, estimated glomerular filtration rate

consecutive hematuria; 3 or more consecutive results, no consecutive hematuria; the others

Missing values: BMI: 1 (consecutive), hypertension: 4 (consecutive 3; no consecutive 1), diabetes mellitus: 2 (no consecutive),

dyslipidemia: 3 (consecutive 1; no consecutive 2), hyperuricemia: 3 (consecutive 1; no consecutive 2)

**Table S3. (a) Renal function, urinary findings and other outcomes at 5 years according to the frequency of hematuria**

|                                                       | thrice (n=680) | twice (n=429) | once (n=440)  | never (n=555) | P value |
|-------------------------------------------------------|----------------|---------------|---------------|---------------|---------|
| Serum creatinine, mg/dl, mean (SD)                    | 0.738 (0.150)  | 0.742 (0.150) | 0.731 (0.141) | 0.756 (0.154) | 0.05    |
| eGFR, mL/min/1.73m <sup>2</sup> , mean (SD)           | 76.10 (12.26)  | 77.32 (12.89) | 78.76 (12.22) | 78.99 (13.58) | <0.001  |
| eGFR, reduction mL/min/1.73m <sup>2</sup> , mean (SD) | 2.28 (8.66)    | 2.67 (9.31)   | 2.16 (8.14)   | 2.37 (8.83)   | 0.8     |
| Dipstick hematuria, n (%)                             |                |               |               |               |         |
| 1+, 2+ or 3+                                          | 567 (83.5)     | 292 (68.2)    | 191 (43.8)    | 127 (23.0)    | <0.001  |
| 2+ or 3+                                              | 324 (47.7)     | 122 (28.5)    | 65 (14.9)     | 37 (6.69)     | <0.001  |
| Dipstick proteinuria, n (%)                           | 53 (7.81)      | 23 (5.37)     | 12 (2.75)     | 31 (5.60)     | 0.004   |
| Hematuria and proteinuria, n (%)                      | 49 (7.22)      | 15 (3.50)     | 8 (1.83)      | 17 (3.07)     | <0.001  |
| CKD, eGFR<60, n (%)                                   | 48 (7.06)      | 24 (5.56)     | 22 (5.00)     | 32 (5.77)     | 0.5     |
| GFR 30% reduction, n (%)                              | 4 (0.59)       | 5 (1.17)      | 3 (0.68)      | 3 (0.54)      | 0.7     |
| Hypertension, n (%)                                   | 107 (15.7)     | 55 (12.8)     | 56 (12.7)     | 76 (13.7)     | 0.4     |
| Glomerulonephritis, n (%)                             | 6 (0.882)      | 6 (1.400)     | 1 (0.227)     | 1 (0.180)     | 0.07    |
| ESKD, n (%)                                           | 0 (0)          | 0 (0)         | 0 (0)         | 0 (0)         |         |
| Urological diseases, n (%)                            | 103 (15.1)     | 59 (13.75)    | 34 (7.73)     | 63 (11.4)     | 0.001   |

Abbreviations: eGFR; estimated glomerular filtration rate; CKD, chronic kidney disease; ESKD, end-stage kidney disease

Missing values: dipstick hematuria: 8 (thrice 1; twice 1; once 4; never 2), dipstick proteinuria: 6 (thrice 1; twice 1; once 3; never 1),

hematuria and proteinuria: 8 (thrice 1; twice 1; once 4; never 2), hypertension: 4 (thrice 1; once 1; never 2)

**Table S3. (b) Renal function, urinary findings and other outcomes at 5 years according to the consistency of hematuria**

|                                                       | consecutive (n=853) | no consecutive<br>(n=1,251) | P value |
|-------------------------------------------------------|---------------------|-----------------------------|---------|
| Serum creatinine, mg/dl, mean (SD)                    | 0.741 (0.147)       | 0.743 (0.154)               | 0.7     |
| eGFR, mL/min/1.73m <sup>2</sup> , mean (SD)           | 76.08 (12.13)       | 78.75 (13.12)               | <0.001  |
| eGFR reduction, mL/min/1.73m <sup>2</sup> , mean (SD) | 2.47 (8.88)         | 2.28 (8.63)                 | 0.6     |
| Dipstick hematuria, n (%)                             |                     |                             |         |
| 1+, 2+ or 3+                                          | 687 (80.6)          | 490 (39.4)                  | <0.001  |
| 2+ or 3+                                              | 380 (44.6)          | 168 (13.5)                  | <0.001  |
| Dipstick proteinuria, n (%)                           | 63 (7.39)           | 56 (4.49)                   | 0.005   |
| Hematuria and proteinuria, n (%)                      | 58 (6.8)            | 31 (2.5)                    | <0.001  |
| CKD, eGFR<60, n (%)                                   | 59 (6.92)           | 67 (5.36)                   | 0.2     |
| GFR 30% reduction, n (%)                              | 7 (0.821)           | 8 (0.640)                   | 0.6     |
| Hypertension, n (%)                                   | 129 (15.1)          | 165 (13.2)                  | 0.2     |
| Glomerulonephritis, n (%)                             | 8 (0.938)           | 6 (0.480)                   | 0.3     |
| ESKD, n (%)                                           | 0 (0)               | 0 (0)                       |         |
| Urological Diseases, n (%)                            | 129 (15.1)          | 130 (10.4)                  | 0.001   |

Abbreviations: eGFR; estimated glomerular filtration rate; CKD, chronic kidney disease; ESKD, end-stage kidney disease

Missing values: dipstick hematuria: 8 (consecutive 1; no consecutive 7), dipstick proteinuria: 6 (consecutive 1; no consecutive 5), hematuria and proteinuria: 8 (consecutive 1; no consecutive 7), hypertension: 4 (consecutive 1; no consecutive 3)

**Table S4. (a) Associations between outcomes and the consistency of hematuria, expressed by risk ratios**

|                                                                                                                        | Risk Ratio       |
|------------------------------------------------------------------------------------------------------------------------|------------------|
| Dipstick hematuria                                                                                                     |                  |
| 1+, 2+ or 3+                                                                                                           | 2.05 (1.90-2.21) |
| 2+ or 3+                                                                                                               | 3.30 (2.82-3.87) |
| Dipstick proteinuria                                                                                                   | 1.65 (1.16-2.33) |
| Hematuria and proteinuria                                                                                              | 2.73 (1.78-4.19) |
| CKD, eGFR<60                                                                                                           | 1.29 (0.92-1.81) |
| GFR 30% reduction                                                                                                      | 1.28 (0.47-3.53) |
| Abbreviations: eGFR; estimated glomerular filtration rate; CKD, chronic kidney disease; ESKD, end-stage kidney disease |                  |

**Table S4. (b) Associations between outcomes and the consistency of hematuria, expressed by adjusted odds ratios**

|                                                                                                                        | Multivariate Odds Ratio* |
|------------------------------------------------------------------------------------------------------------------------|--------------------------|
| Dipstick hematuria                                                                                                     |                          |
| 1+, 2+ or 3+                                                                                                           | 6.31(5.13-7.80)          |
| 2+ or 3+                                                                                                               | 5.17 (4.17-6.44)         |
| Dipstick proteinuria                                                                                                   | 1.86 (1.27-2.74)         |
| Hematuria and proteinuria                                                                                              | 3.22 (2.05-5.13)         |
| CKD, eGFR<60                                                                                                           | 0.90 (0.60-1.34)         |
| GFR 30% reduction                                                                                                      | 1.41 (0.47-4.14)         |
| Abbreviations: eGFR; estimated glomerular filtration rate; CKD, chronic kidney disease; ESKD, end-stage kidney disease |                          |

\* Logistic regression analysis, adjusted for age, sex, BMI, hypertension, diabetes Mellitus, dyslipidemia, hyperuricemia, baseline GFR
