# Supplementary material for: Association between 3-Year Repetitive Isolated Hematuria and eGFR Deterioration in an Apparently Healthy Population: A Retrospective Cohort Study
Source: MDPI journal article supplement (doi:10.3390/ijerph191811466), 2022-09-12
Supplement: s1 [file s1]

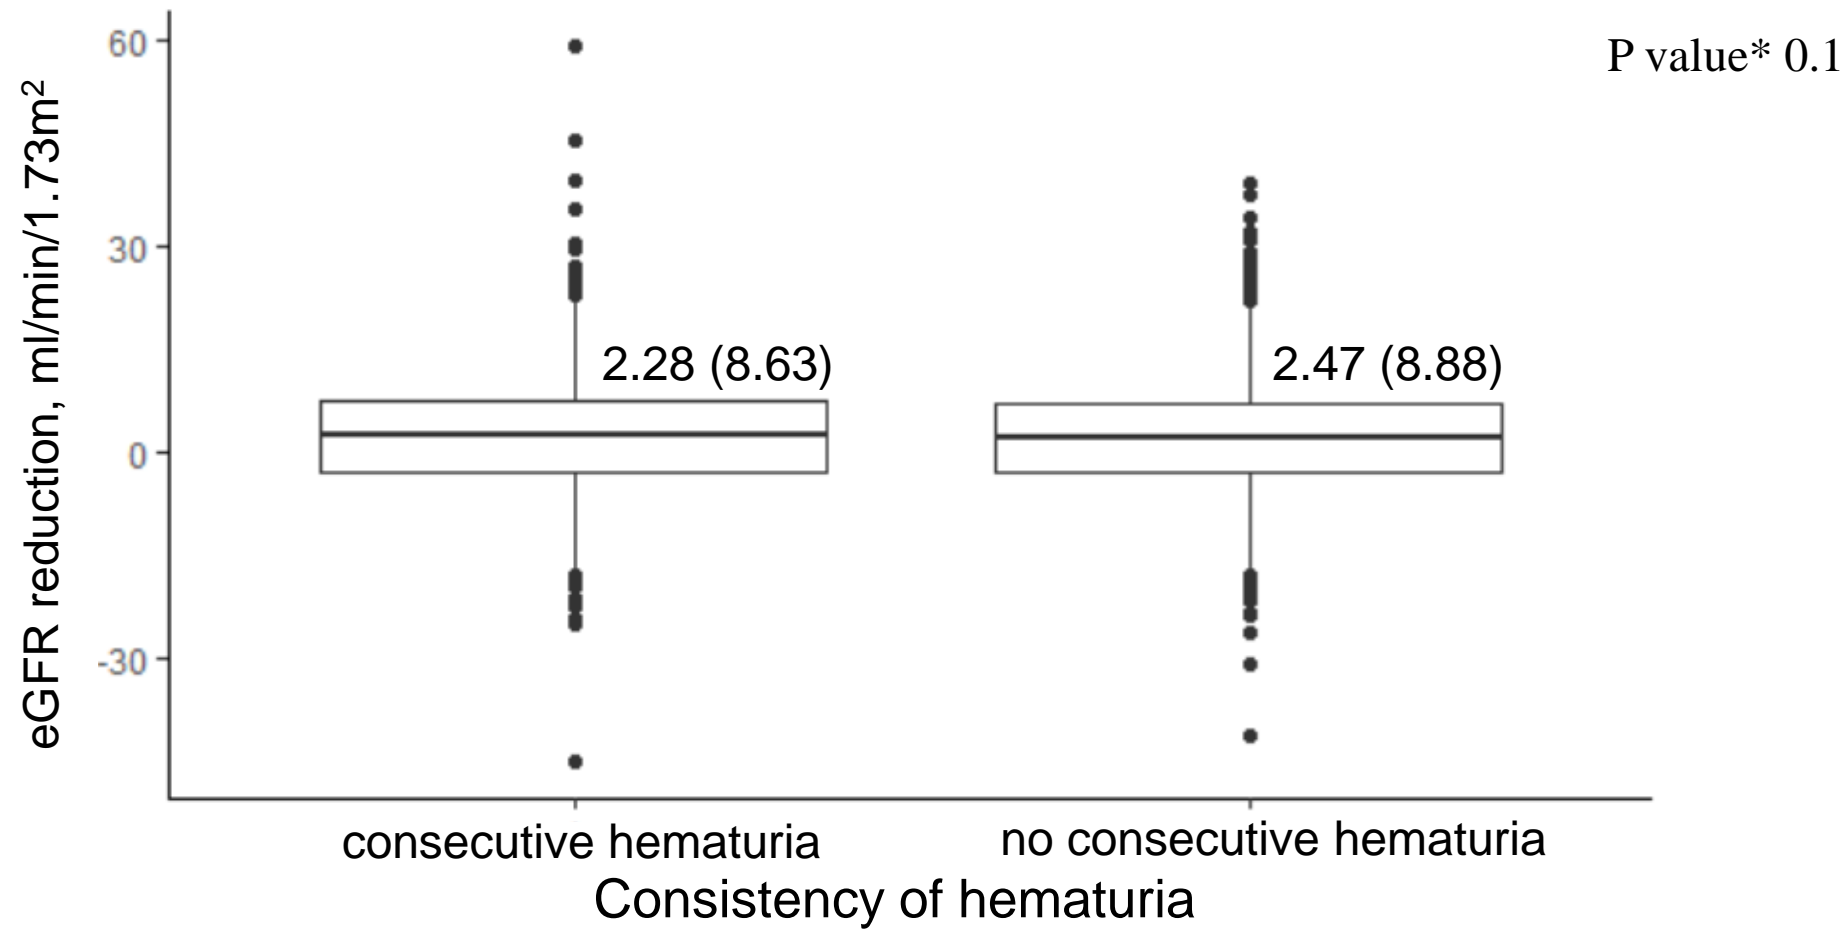

**Figure S1: eGFR reduction at 5 years according to the consistency of hematuria**

\* Adjusted for age, sex, BMI, hypertension, diabetes mellitus, dyslipidemia, hyperuricemia, baseline GFR

(a)

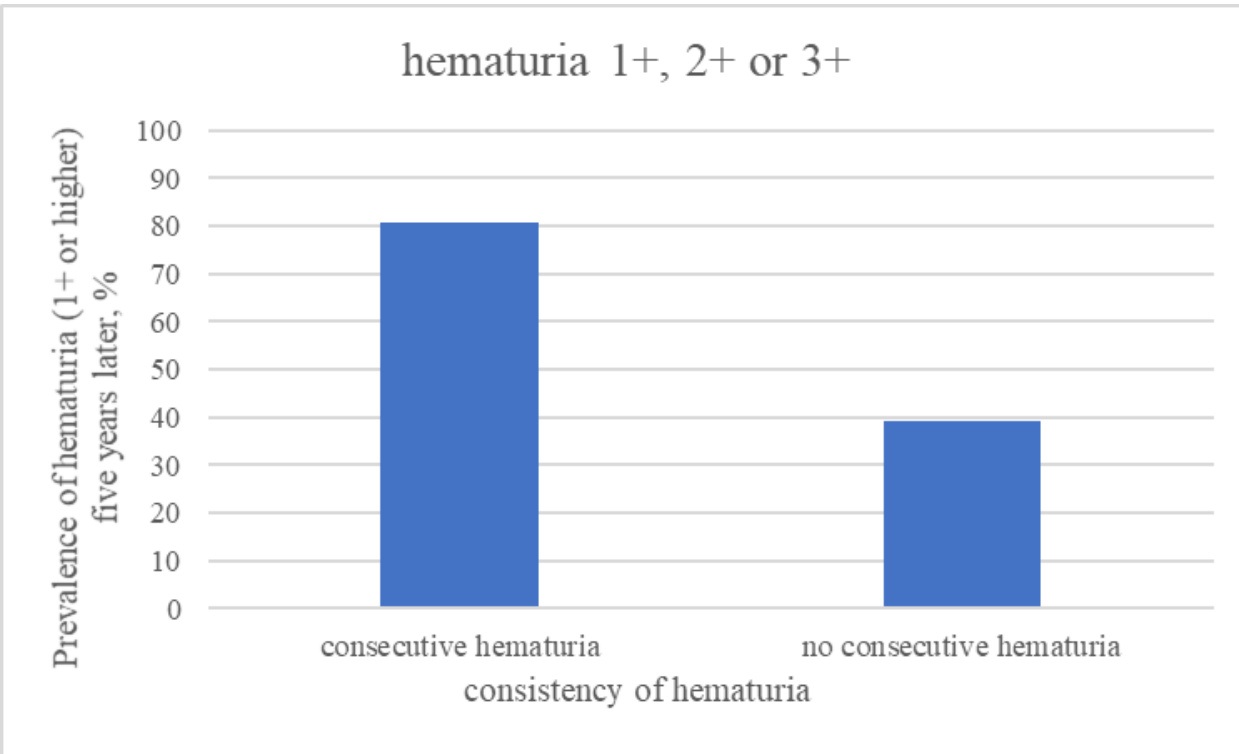

(b)

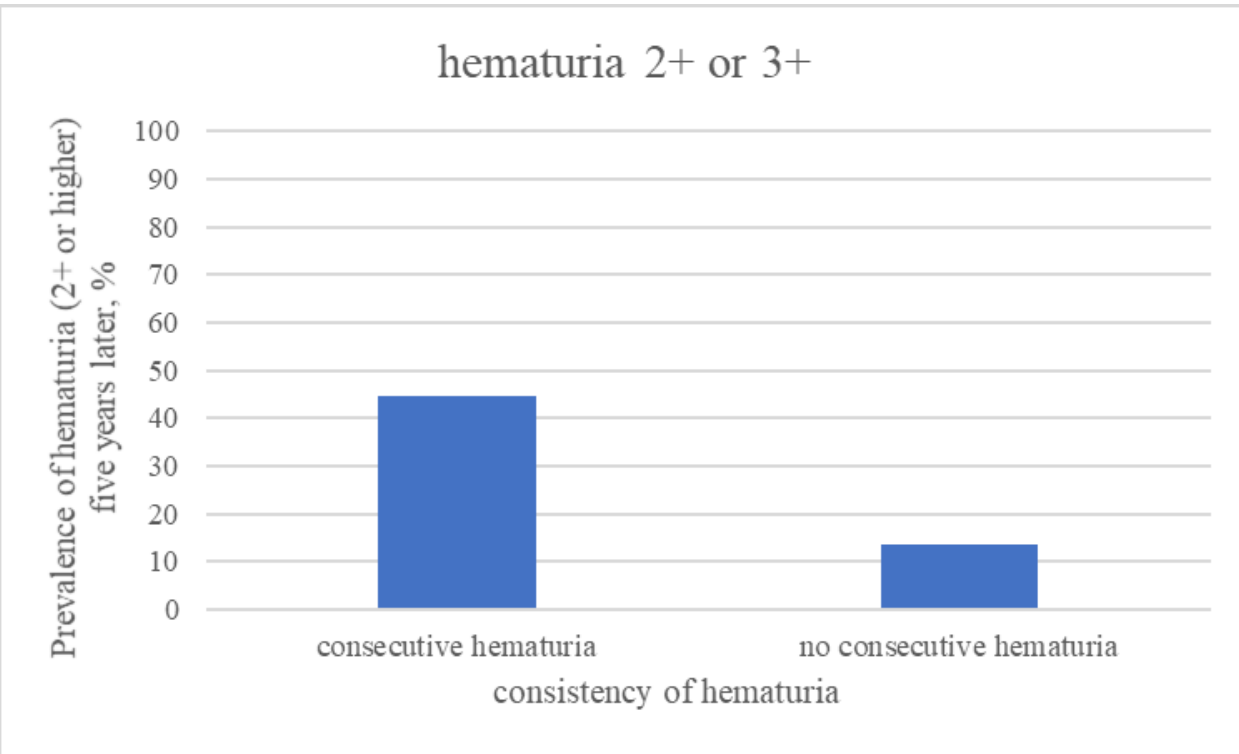

**Figure S2: Prevalence of four urinary findings suggesting glomerulonephritis, in two groups that is stratified by the consistency of hematuria.**

**(a) hematuria 1+ or higher: 1+, 2+, or 3+, (b) hematuria 2+ or higher: 2+ or 3+, (c) proteinuria, (d) hematuria and proteinuria**

(c)

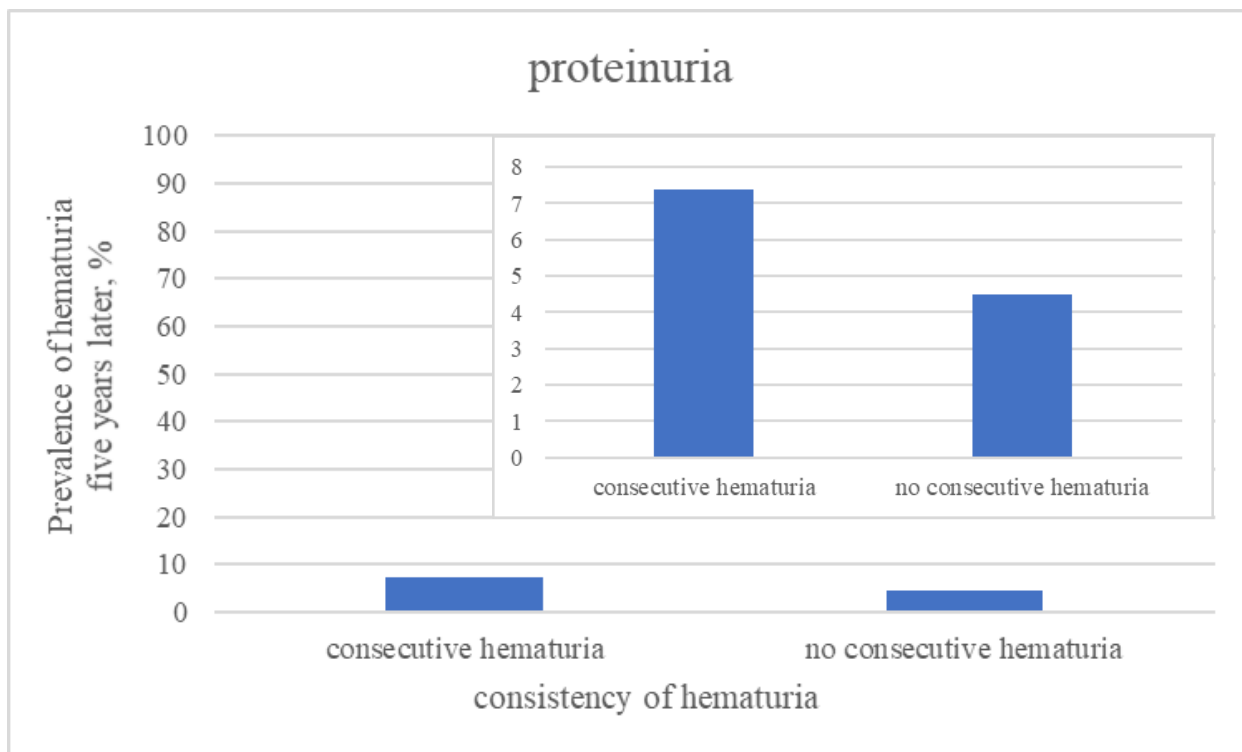

(d)

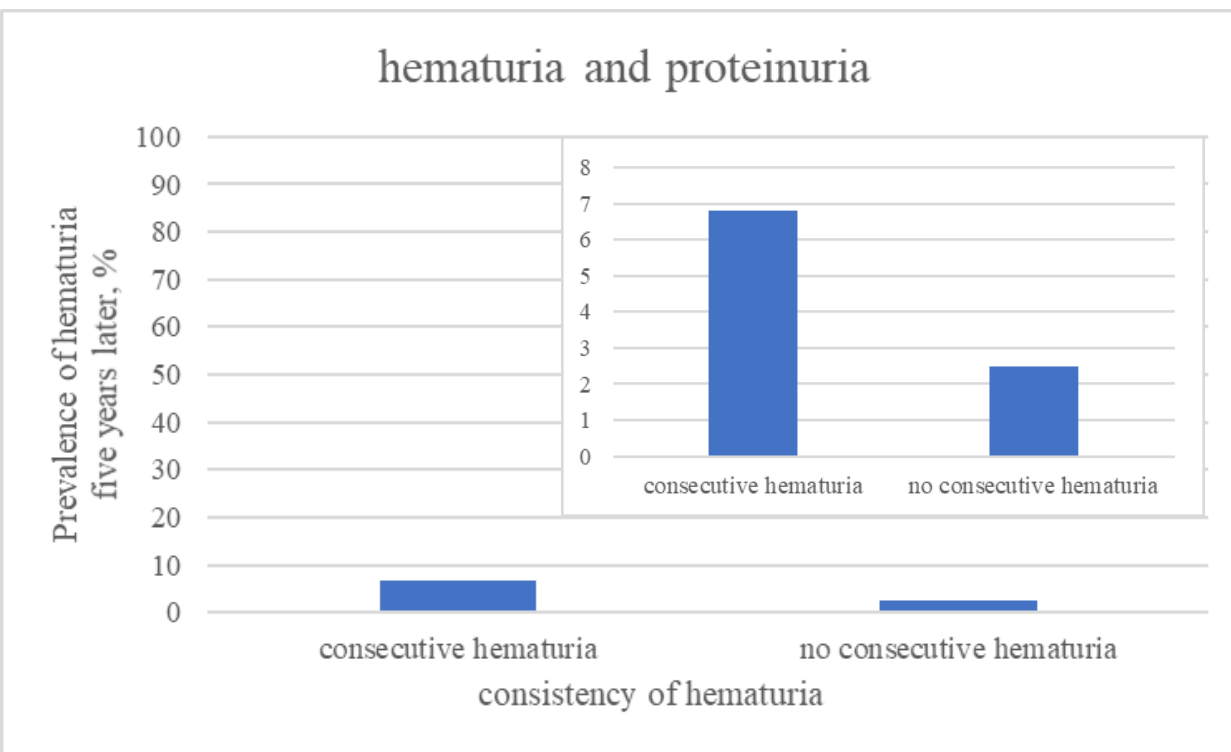

**Figure S2: Prevalence of four urinary findings suggesting glomerulonephritis, in two groups that is stratified by the consistency of hematuria.**

**(a) hematuria 1+ or higher: 1+, 2+, or 3+, (b) hematuria 2+ or higher: 2+ or 3+, (c) proteinuria, (d) hematuria and proteinuria**
